# Supplementary material
Source: MDPI journal article supplement (https://www.mdpi.com/2072-4292/12/16/2601)
Supplement: s1 [file s1]

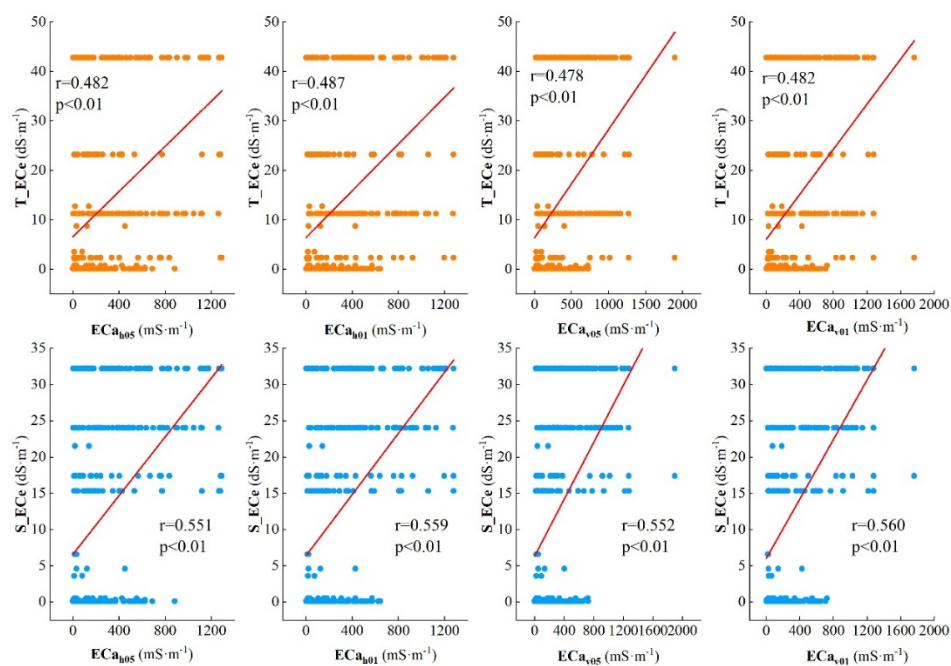

Figures.S1 Scatter plot of observed ECa (four dipole mode) from this study with ECe at depth of 0- 30 cm (T\_ECe, dS·m<sup>-1</sup>) and 30-100 cm (S\_ECe, dS·m<sup>-1</sup>) from HWSD.

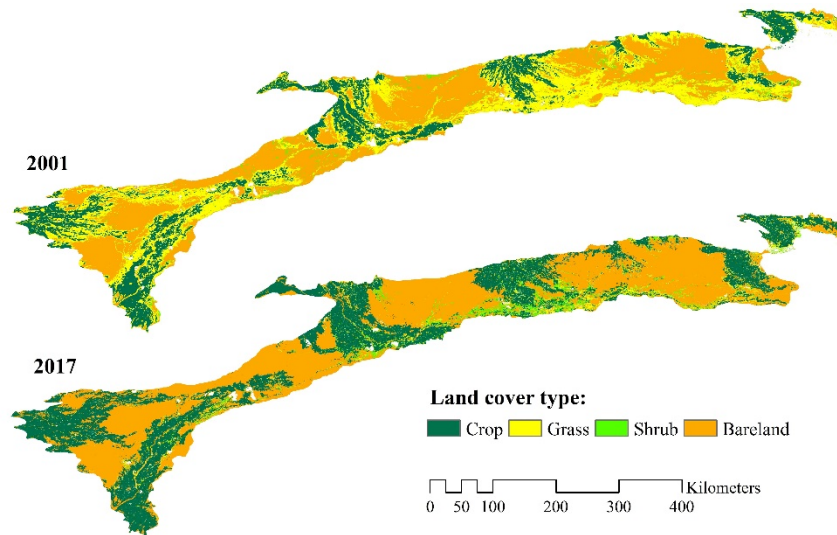

Figures.S2 Land use type of 2001 and 2017 in the study area
